# Supplementary material
Source: Research Square preprint supplement (doi:10.21203/rs.3.rs-9188982/v1)
Supplement: Supplementary file 1 [file 14e1479efb4703482adc328c.xlsx]

## Sheet: Sheet1 
The number of 371 targets of BBR from GeneCards	LDLR, BCL2L1, CCND1, LINC01672, SLC2A4, CDK4, CASP8, WEE1, CDK1, BDNF-AS, CYP2D6, CDK6, CDK2, CCNB1, BIRC5, NFE2L2, LPL, MIR7-3HG, TMX2-CTNND1, CASC2, BCL2, MT-TP, CYP1A2, CYCS, SCARNA5, ABCC8, CERNA3, AR, CYP3A4, TP53, TNF, TERT, MAPT, SLC6A4, KCNJ11, RAD52, SENP8, MAPK14, H19, AKT1, CCL2, IL1B, CASP3, PCSK9, ABCB1, MIR21, CXCL8, MMP2, PRKAA1, JUN, SARM1, NFKB1, SOD2-OT1, BID, NFKBIA, PPARG, ANX…
The number of 112 targets of BBR from swisstargetprediction	ACHE, HTR2B, BCHE, ADRA2C, ADRA2B, CHRM1, SIGMAR1, CYP2D6, SAE1, RAC1, CDC42, RPS6KB1, AURKA, AURKB, CYP11B2, PRF1, GRIA1, TBXAS1, HPGD, SLC1A3, GABRB3, GABRB3, GABRB3, PIM1, PIM2, MET, HTR3A, GRK5, CYP11B1, IMPDH2, PIK3CA, F3, CYP19A1, BCAT2, TRPM8, ICAM1, SELE, MAOB, PIK3CD, PIK3CB, PIK3CG, MAPKAPK2, PARP10, CHEK2, CCNC, CDK8, MAPK10, AGPAT2, TGM2, SCD, XBP1, TYMS, DHFR, GABRA2, ROCK1, PRKACA, …
The number of 452 targets related to BBR targets	ACHE, HTR2B, BCHE, ADRA2C, ADRA2B, CHRM1, SIGMAR1, CYP2D6, SAE1, RAC1, CDC42, RPS6KB1, AURKA, AURKB, CYP11B2, PRF1, GRIA1, TBXAS1, HPGD, SLC1A3, GABRB3, PIM1, PIM2, MET, HTR3A, GRK5, CYP11B1, IMPDH2, PIK3CA, F3, CYP19A1, BCAT2, TRPM8, ICAM1, SELE, MAOB, PIK3CD, PIK3CB, PIK3CG, MAPKAPK2, PARP10, CHEK2, CCNC, CDK8, MAPK10, AGPAT2, TGM2, SCD, XBP1, TYMS, DHFR, GABRA2, ROCK1, PRKACA, CHRM4, JAK2, LCK…
The number of 273 targets of NAFLD from OMIM	SLC4A4, TNF, IGF2R, OGG1, HNMT, MUC7, STAM2, RHAG, SLC6A20, SHOX2, CASP8, H3C1, DRD3, FCGR2B, FKBP5, IL2, IL13, FCGR3B, HTT, FL1, LBR, SLIT2, APC, BEVI, NMNAT1, RHCE, AHDC1, MIER1, PTPN22, FCGR2A, LAPTM4A, REL, SMYD5, CTLA4, RAF1, CTNNB1, TREX1, PIK3CA, HPGDS, CASP6, GHR, DHFR, SCGB3A2, RPS14, HLA-G, EGFR, ERV3, MUC3B, MUC3A, MET, CFTR, PDGFRL, RECQL2, CER1, XRCC9, GNAQ, SPTLC1, TLR4, STAM, ALOX5…
The number of 1143 targets of NAFLD from GeneCards	PNPLA3, MSR1, TM6SF2, ADIPOQ, INS, GPT, PPARG, MBOAT7, TNF, PPARA, LEP, HFE, FGF21, APOB, MTTP, IL6, RETN, RBP4, FASN, SREBF1, GGT1, NR1H4, PEMT, TLR4, CYP2E1, MLXIPL, APOC3, AHSG, SERPINE1, LEPR, KRT18, ACACA, UCP2, GCG, LPL, SIRT1, ATG7, CD36, ACOX1, ALB, CPT1A, PLIN2, TGFB1, SCD, NR1I2, CYP7A1, HP, FABP1, LIPC, DGAT1, HMGCR, APOA1, PRMT7, YARS1, SCARB1, IL1B, FOXO1, GPT2, ACACB, ADIPOR2, PPARG…
The number of 22 targets of NAFLD from TTD	FGFR1, PPARA, PPARG, FXR, FASN, GCGR, GLP1R, DGAT2, CDK9, PPARD, Nrf2, AMPK, ANGPTL3, LGALS3, RIPK1, KLB, TG2, TG2, PNPLA3, HSD17B13, DGAT2, FGF19
The number of 1404 targets related to NAFLD targets	PNPLA3, MSR1, TM6SF2, ADIPOQ, INS, GPT, PPARG, MBOAT7, TNF, PPARA, LEP, HFE, FGF21, APOB, MTTP, IL6, RETN, RBP4, FASN, SREBF1, GGT1, NR1H4, PEMT, TLR4, CYP2E1, MLXIPL, APOC3, AHSG, SERPINE1, LEPR, KRT18, ACACA, UCP2, GCG, LPL, SIRT1, ATG7, CD36, ACOX1, ALB, CPT1A, PLIN2, TGFB1, SCD, NR1I2, CYP7A1, HP, FABP1, LIPC, DGAT1, HMGCR, APOA1, PRMT7, YARS1, SCARB1, IL1B, FOXO1, GPT2, ACACB, ADIPOR2, PPARG…
The 147 intersection targets between BBR and NAFLD	ABCA1, ACTB, AHR, AKR1A1, AKT1, ANGPTL2, AOC3, APP, AR, ATF3, ATP2A2, BCAP31, BCL2, BGLAP, BIRC5, CASP3, CASP8, CAT, CCL19, CCL2, CCNC, CD44, CDK4, CDK8, CDK9, CDKN1A, CHUK, CNR2, CTNNB1, CXCL8, CYBB, CYP1A1, CYP1A2, CYP2A6, CYP2D6, CYP3A4, DDIT3, DHFR, DICER1, DNASE1, DPP4, DRD3, EGFR, EGR1, EP300, F2, F3, FAS, FASN, FBN1, FLNA, FN1, GCKR, GDF15, GLUD1, GRK2, GRM5, GSK3B, HIF1A, HIF3A, HNF1A, HN…
The number of 6 core targets	AKT1, IL6, TP53, TNFa, IL1B, BCL2
